# Supplementary material for: An enhanced network of energy metabolism, lysine acetylation, and growth-promoting protein accumulation is associated with heterosis in elite hybrid rice
Source: PubMed Central journal article supplement — Plant Commun. 2023 Feb 11;4(4):100560. doi: 10.1016/j.xplc.2023.100560 (PMC10363507; doi:10.1016/j.xplc.2023.100560), 2023-02-11
Supplement: mmc1.pdf [file mmc1.pdf]

**Plant Communications, Volume 4**

**Supplemental information**

**An enhanced network of energy metabolism, lysine acetylation, and growth-promoting protein accumulation is associated with heterosis in elite hybrid rice**

**Xuan Ma, Qingxiao Jia, Sheng Li, Zhengting Chen, Xin Ming, Yu Zhao, and Dao-Xiu Zhou**

# **Supplemental information**

## **An enhanced network of energy metabolism, lysine acetylation and growth-promoting protein accumulation is associated with heterosis in elite hybrid rice**

Xuan Ma<sup>1</sup>, Qingxiao Jia<sup>1</sup>, Sheng Li<sup>1</sup>, Zhengting Chen<sup>1</sup>, Xin Ming<sup>1</sup>, Yu Zhao<sup>1</sup>, Dao-Xiu Zhou<sup>1,2\*</sup>

<sup>1</sup> National Key Laboratory of Crop Genetic Improvement, Hubei Hongshan Laboratory, Huazhong Agricultural University, 430070 Wuhan, China

<sup>2</sup> Institute of Plant Science Paris-Saclay (IPS2), CNRS, INRAE, University Paris-Saclay, 91405 Orsay, France

\*Correspondence: Dao-Xiu Zhou (dao-xiu.zhou@universite-paris-saclay.fr)

**Supplemental Figures: 1~11**

**Supplemental Tables: 1~4**

# Supplemental Figures

**A**

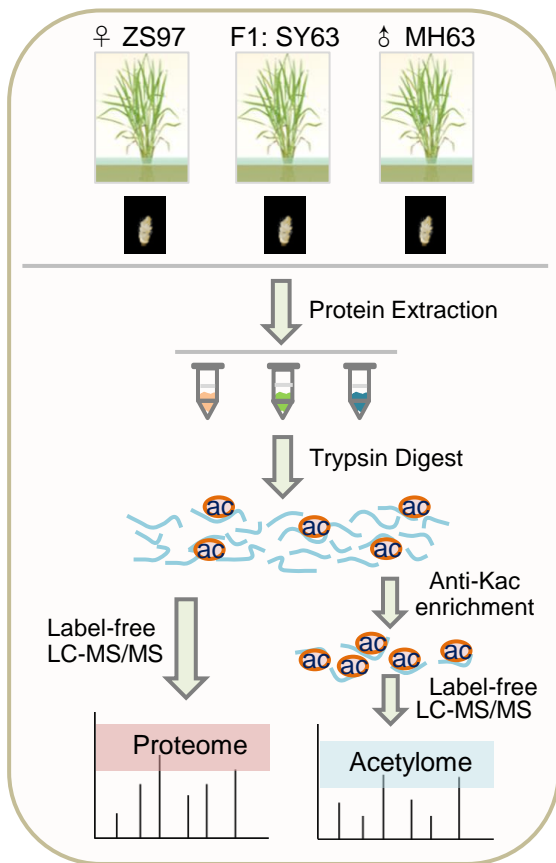

**B**

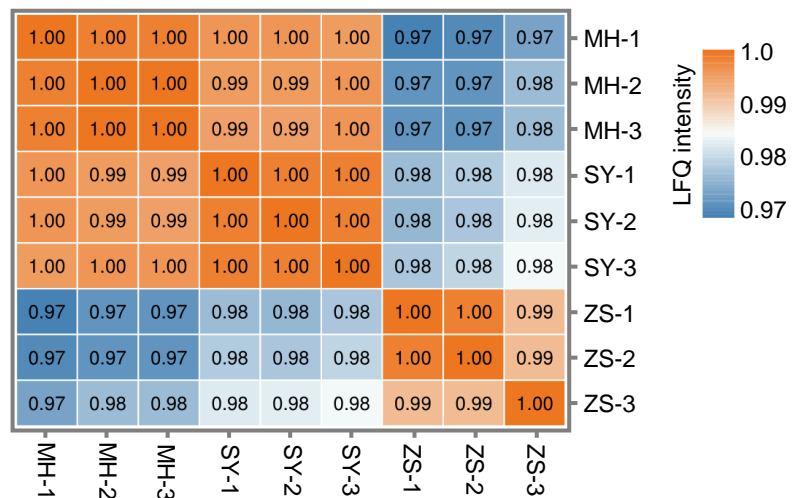

**C**

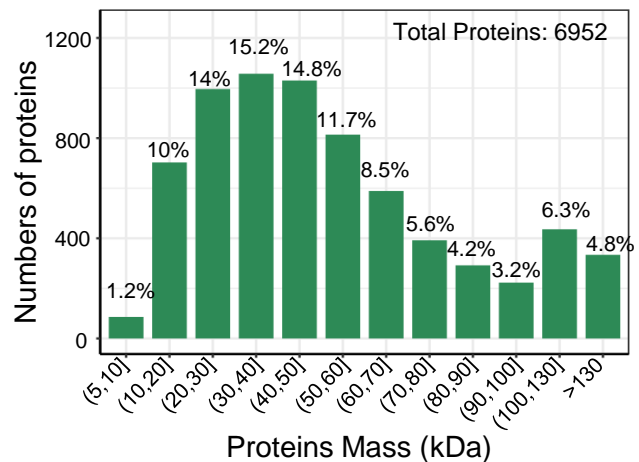

**Supplemental Figure 1. Quality control of proteomes of MH63, ZS97 and the hybrid SY63 panicle meristems. (A)** Experimental flowchart of quantitative proteome and lysine-acetylome of panicle samples by LC-MS/MS. **(B)** Heatmap of Pearson correlation coefficients of the 3 proteomic replicates of MH63 (MH), ZS97 (ZS), and SY63 (SY). **(C)** Distribution by molecular weight of the identified proteins.

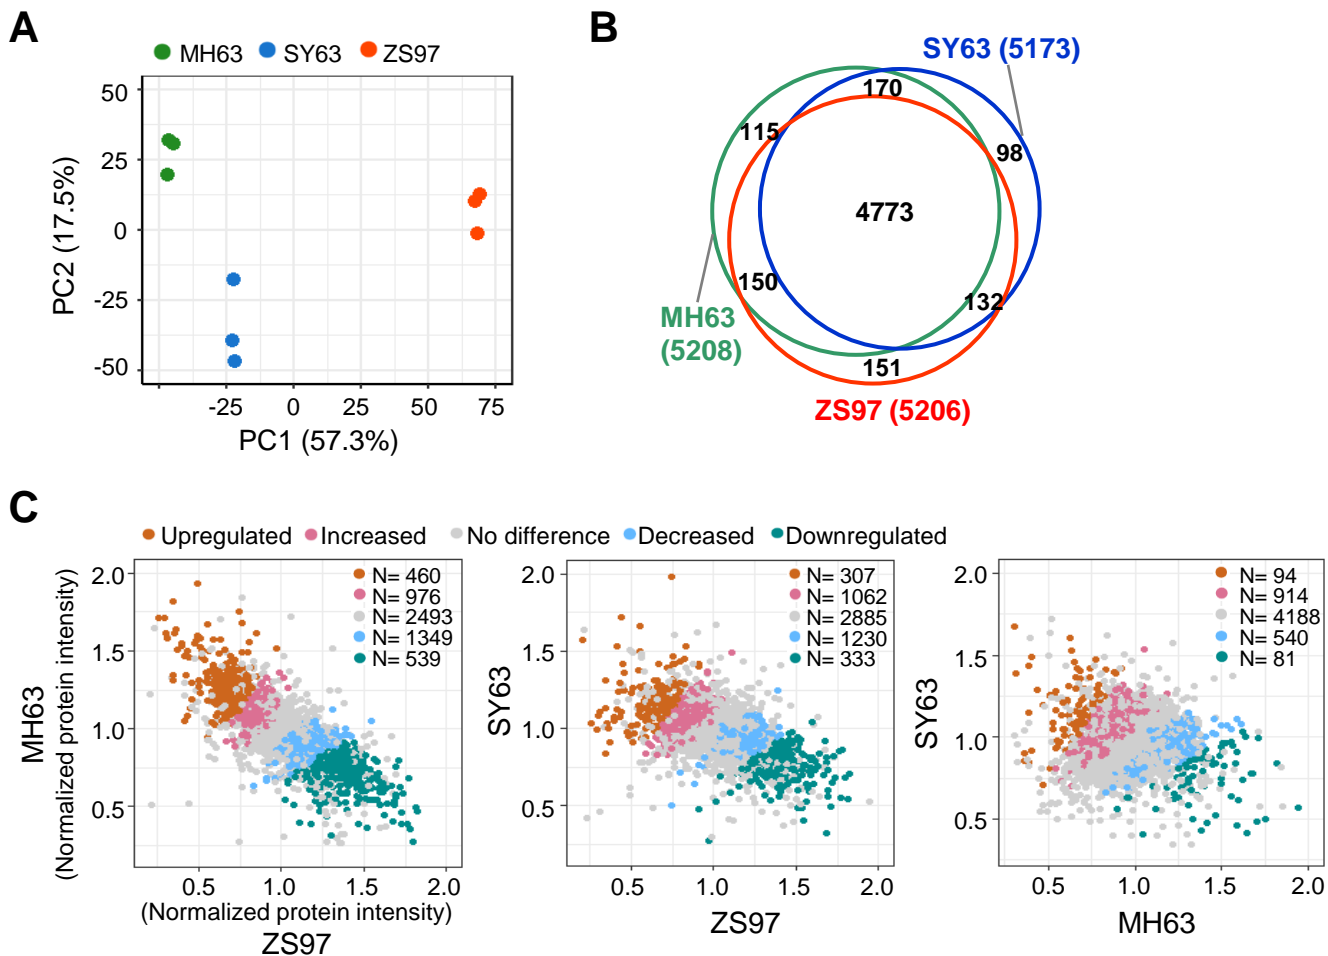

**Supplemental Figure 2. Comparison of SY63, MH63, and ZS97 proteomes. (A)** PCA analysis of the proteomes of three biological replicates of each genotype are shown. **(B)** Venn diagrams showing overlapped proteins between MH63, SY63 and ZS97. **(C)** Scatter-plot showing the differentially accumulated proteins in MH63 vs. ZS97, SY63 vs. ZS97 and SY63 vs. MH63. Fold change (FC)  $\geq 1.5$  and  $P < 0.05$  (Two tailed t-test) was defined as up-regulated,  $1 < FC < 1.5$  and  $P < 0.05$  was defined as increased,  $0.667 < FC < 1$  and  $P < 0.05$  was defined as decreased,  $0 < FC < 0.667$  and  $P < 0.05$  was defined as downregulated,  $FC = 1$  or  $P > 0.05$  was defined as no difference.

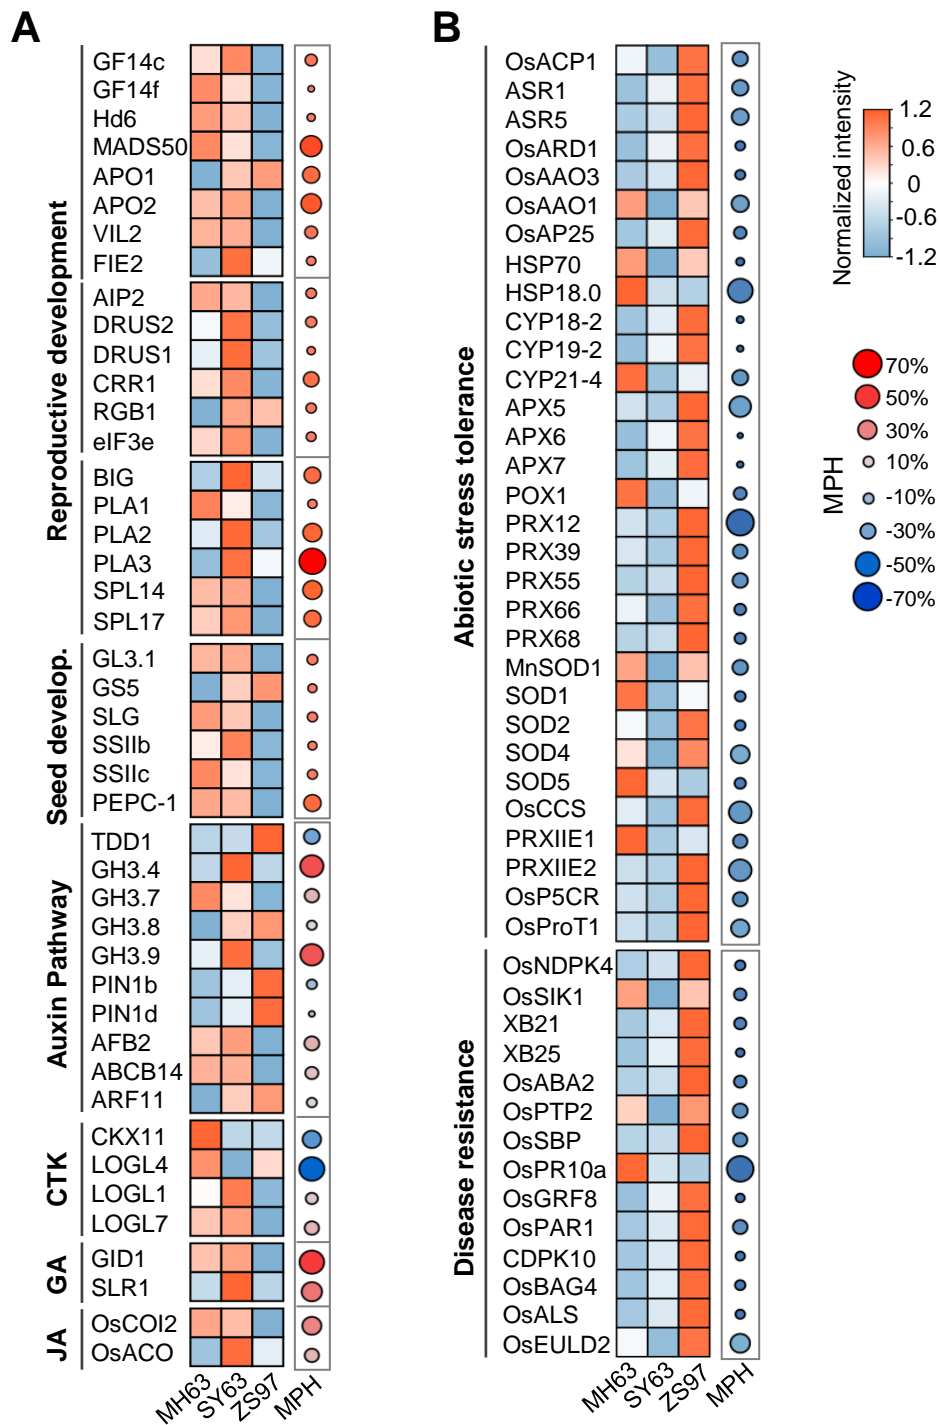

**Supplemental Figure 3. (A)** Heatmap showing heterotic accumulation of proteins involved in reproductive development, starch synthesis, and hormone signaling pathways in SY63 relative to MH63 and ZS97. **(B)** Heatmap showing of abiotic and biotic stress proteins that were reduced in SY63 panicle.

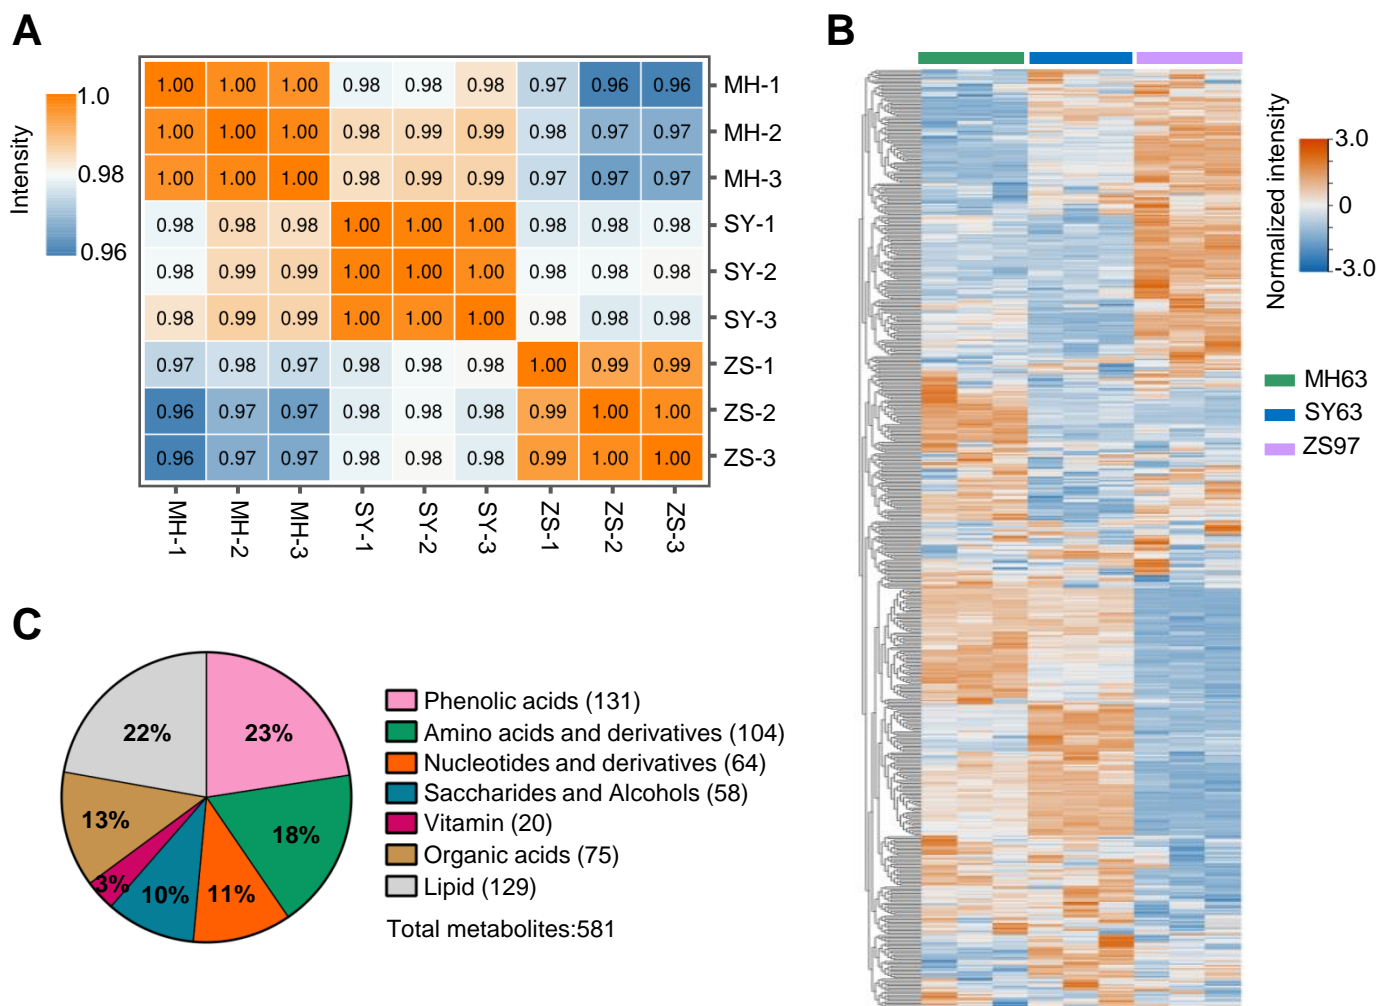

**Supplemental Figure 4. Primary metabolomic analysis of MH63, ZS97 and the hybrid SY63 young panicles. (A)** Metabolomic replicates and Pearson correlation coefficients of MH63 (MH), SY63 (SY) and ZS97 (ZS). **(B)** Heatmap of the overall primary metabolites detected in MH63, SY63, and ZS97 young panicles. **(C)** Percentage of different types of the primary metabolites identified in the panicles.

**A**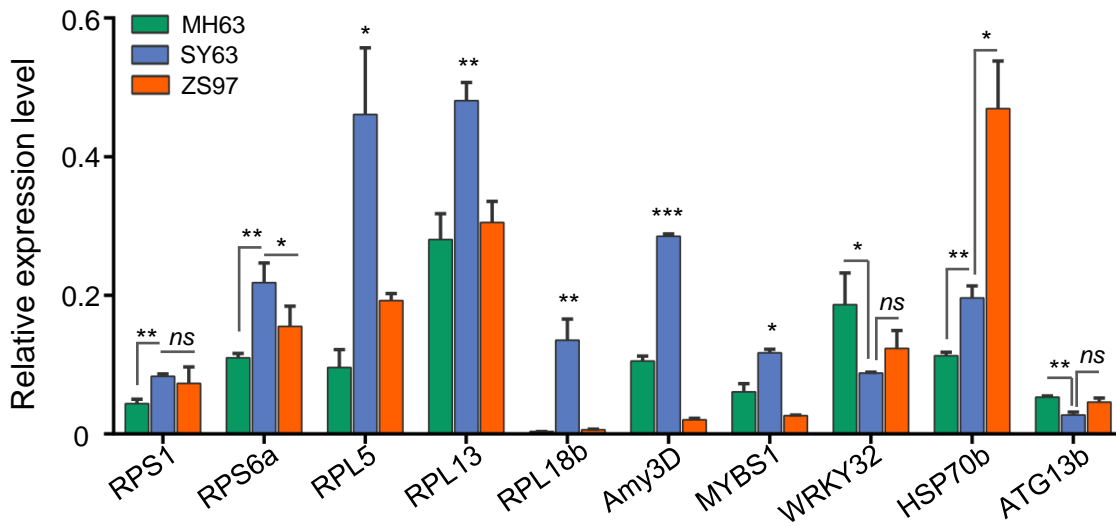**B**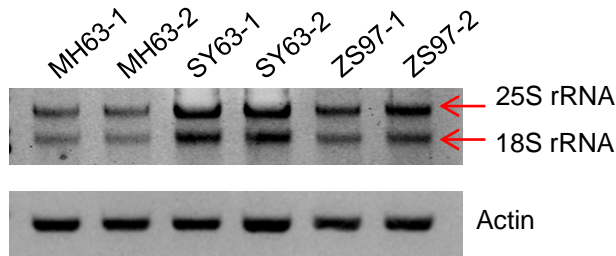

**Supplemental Figure 5. Relative expression levels of the genes related to TOR signaling and the rRNA abundance in MH63, ZS97 and the hybrid SY63 young panicles. (A)** Real-time quantitative PCR (RT-qPCR) analysis of the expression of ribosomal genes (RPS1, RPS6a, RPL5, RPL13 and RPL18b) and energy metabolism related genes (relative to *Actin*). Bars indicate means  $\pm$  SD from three replicates. \*,  $P < 0.05$ , \*\*,  $P < 0.01$ , \*\*\*,  $P < 0.001$ , *ns*,  $P > 0.05$  (Two tailed t-test). **(B)** Agarose gel electrophoresis detection of rRNA abundance in MH63, SY63, and ZS97 young panicles (total RNA extracted with 100 mg FW of panicle meristem). Two biological replicates are shown.

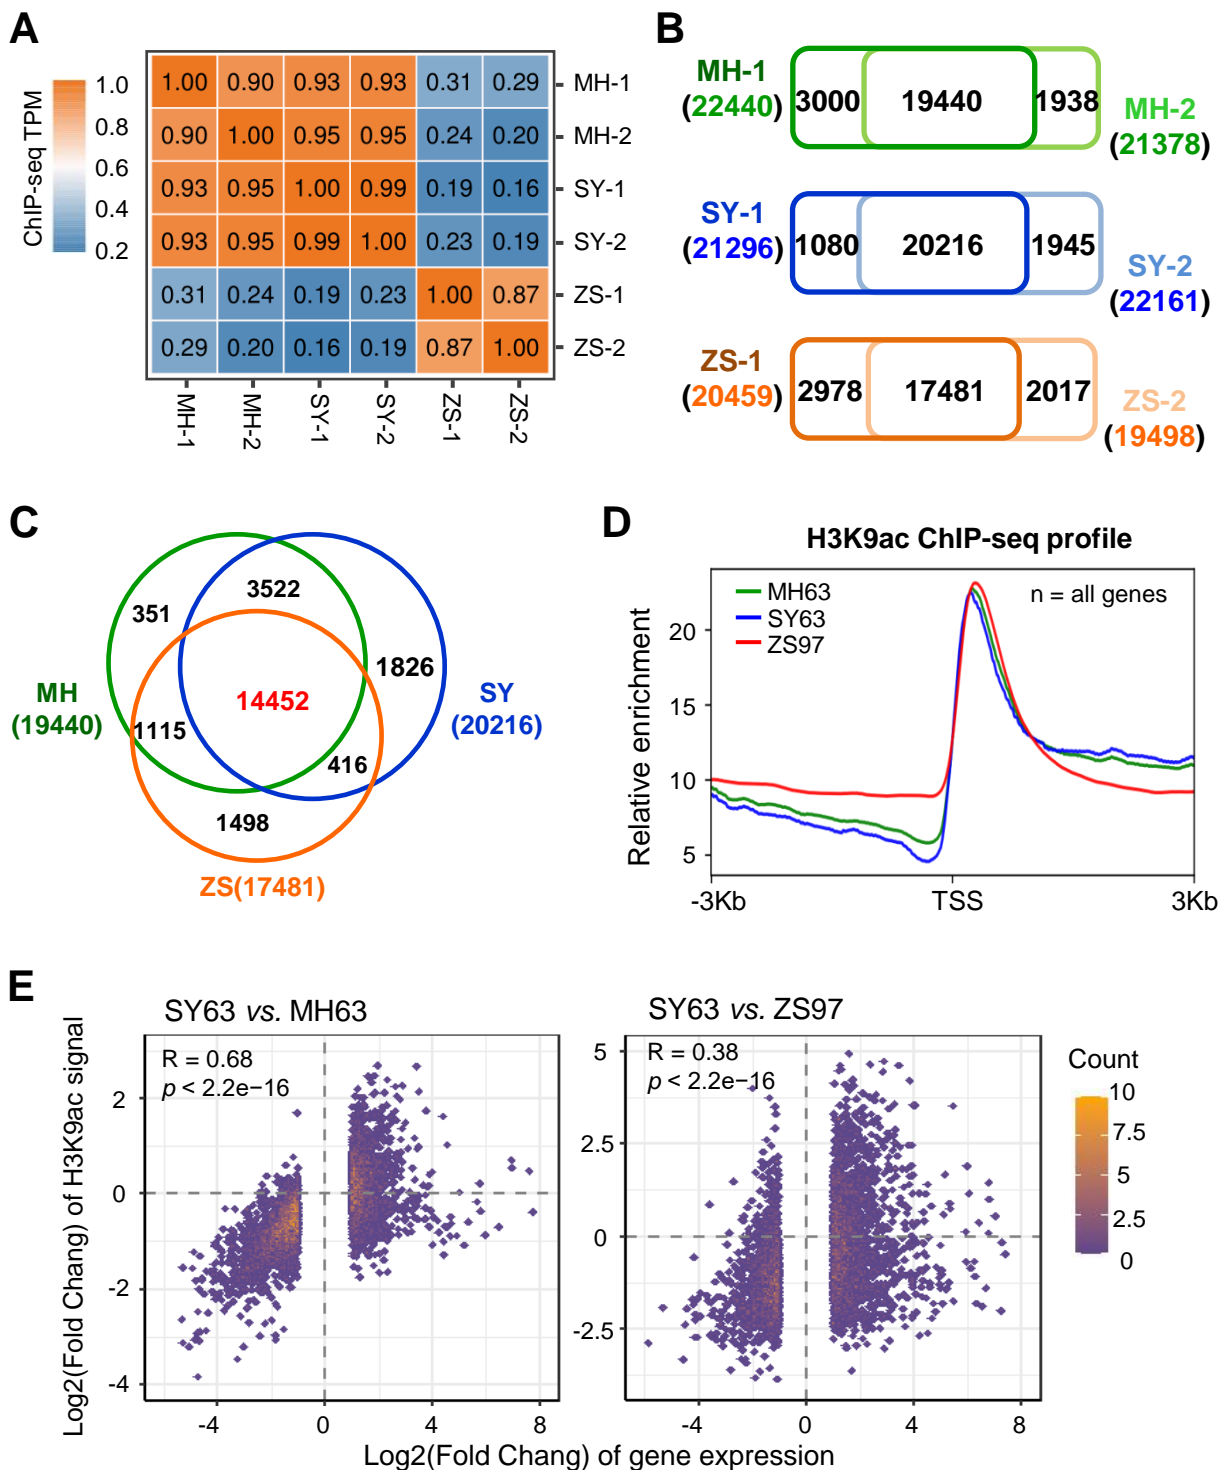

**Supplemental Figure 6. H3K9ac ChIP-seq analysis of MH63, SY63 and ZS97. (A)**

Correlation matrix of MH63 (MH), SY63 (SY) and ZS97 (ZS) ChIP-seq replicates. Pearson correlation coefficient was calculated by TPM. **(B)** Venn diagrams showing overlapped genes with H3K9ac modification in the two replicates of each genotype. **(C)** Venn diagram showing overlapping of the H3K9ac modified genes between MH63, SY63 and ZS97. **(D)** Metaplots of genic H3K9ac levels in MH63, SY63 and ZS97. **(E)** Scatter-plot showing the changes of H3K9ac (Fold change of TPM) between SY63 and the parents was positively correlated to gene expression (Fold change of FPKM).



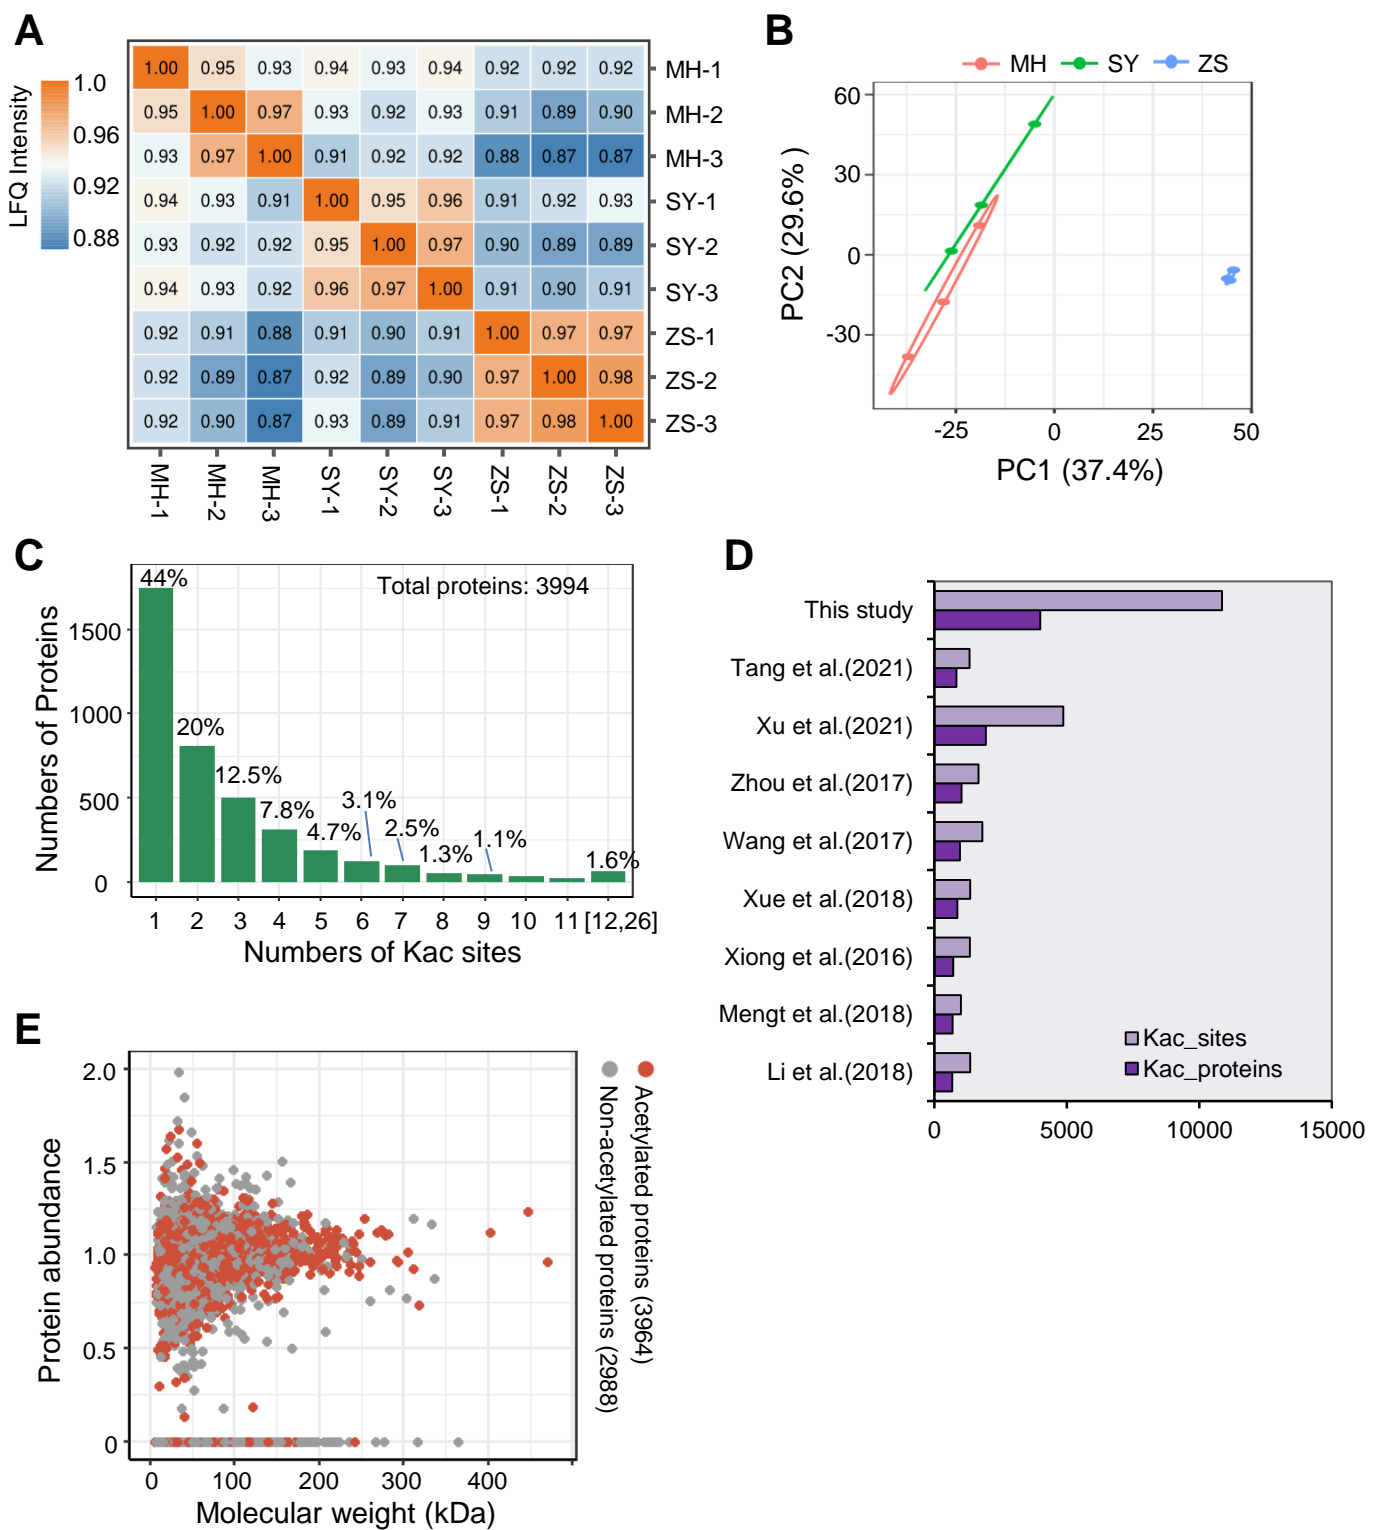

**Supplemental Figure 7. Quality control and analysis of protein lysine acetylome of MH63, ZS97 and the hybrid SY63 panicle meristems. (A)** Heatmap of Pearson correlations of the 3 replicates for each genotype. **(B)** PCA analysis of the acetylomes from the three genotypes. **(C)** Distribution of the lysine acetylation (Kac) sites of proteins identified in acetylome. **(D)** The numbers of Kac sites and acetylated proteins identified in the study and previous ones in rice. **(E)** Scatter-plot showing distribution of the acetylated proteins and all proteins by molecular mass.

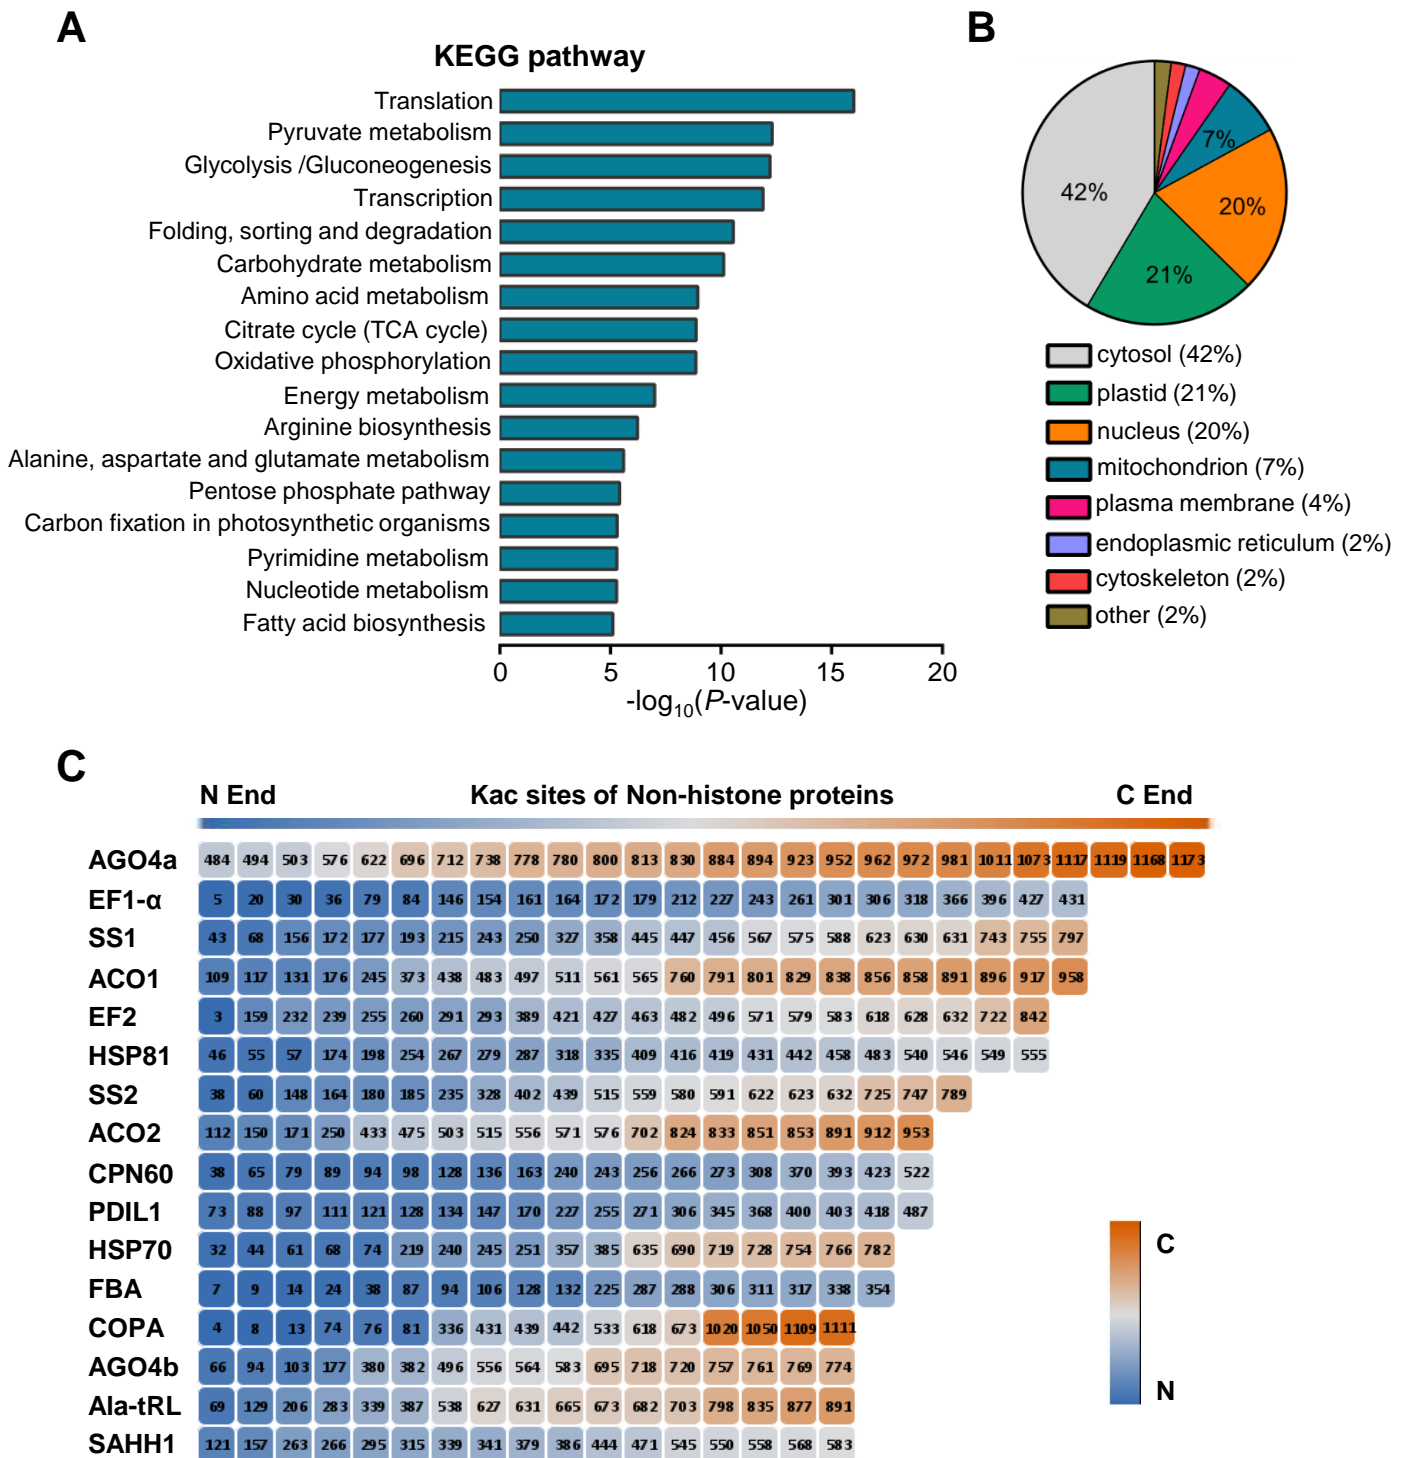

**Supplemental Figure 8. Characterization of acetylated proteins in rice panicles. (A)** KEGG pathway enrichment of the acetylated proteins in rice panicle. **(B)** Subcellular localization prediction of the acetylated proteins. **(C)** The hyper-acetylated proteins and the Kac sites (without histone, Kac sites  $\geq 17$  are shown) identified in the rice panicles.

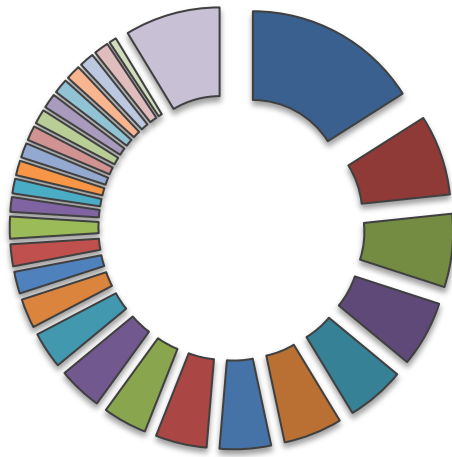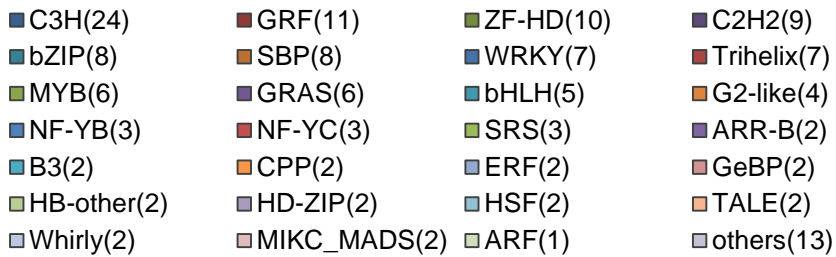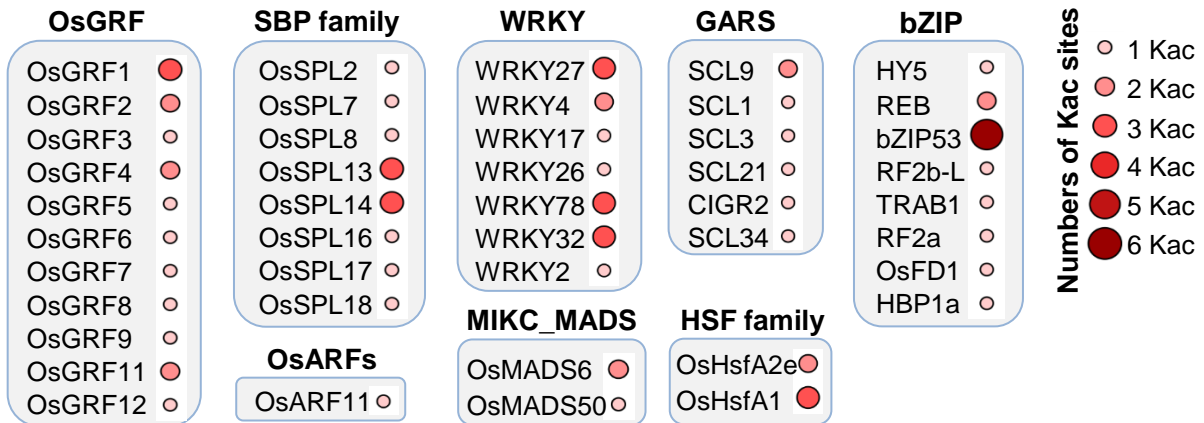

**Supplemental Figure 9.** Acetylated transcription factors in the rice panicles.

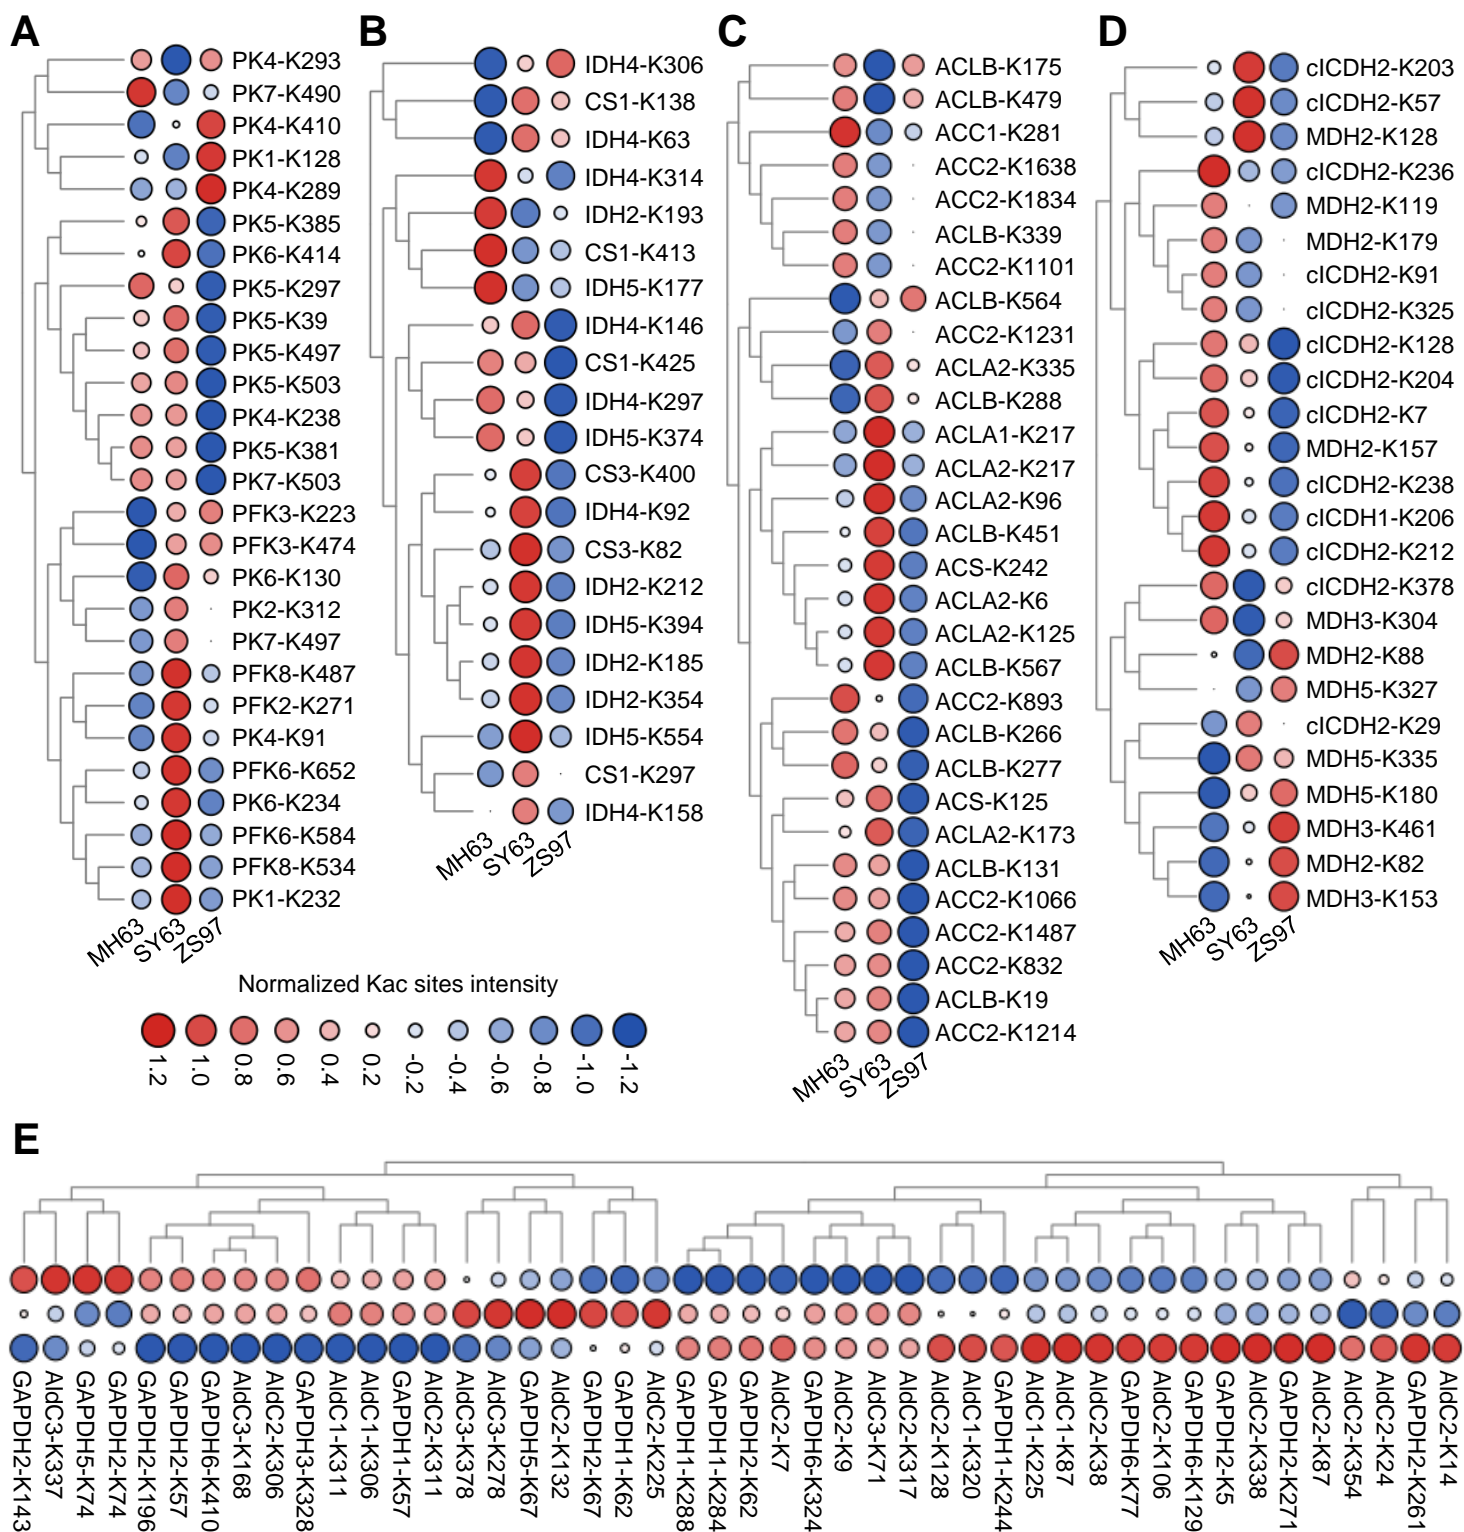

**Supplemental Figure 10. Lysine acetylation (Kac) levels of enzymes in glycolysis, TCA and acetyl-CoA synthesis in MH63, SY63 and ZS97 panicles.** As shown the heatmaps of Kac levels of **(A)** phosphofructokinase (PFK), pyruvate kinase (PK), **(B)** citrate synthase (CS), isocitrate dehydrogenase (IDH), **(C)** ATP-citrate lyase (ACLA/B), acetyl-coenzyme A synthetase (ACS), acetyl-CoA carboxylase (ACC), **(D)** cytosolic isocitrate dehydrogenase (cICDH), malate dehydrogenase (MDH), **(E)** glyceraldehyde-3-phosphate dehydrogenase (GAPDH) and fructose-bisphosphate aldolase (AldC) in the three genotypes.

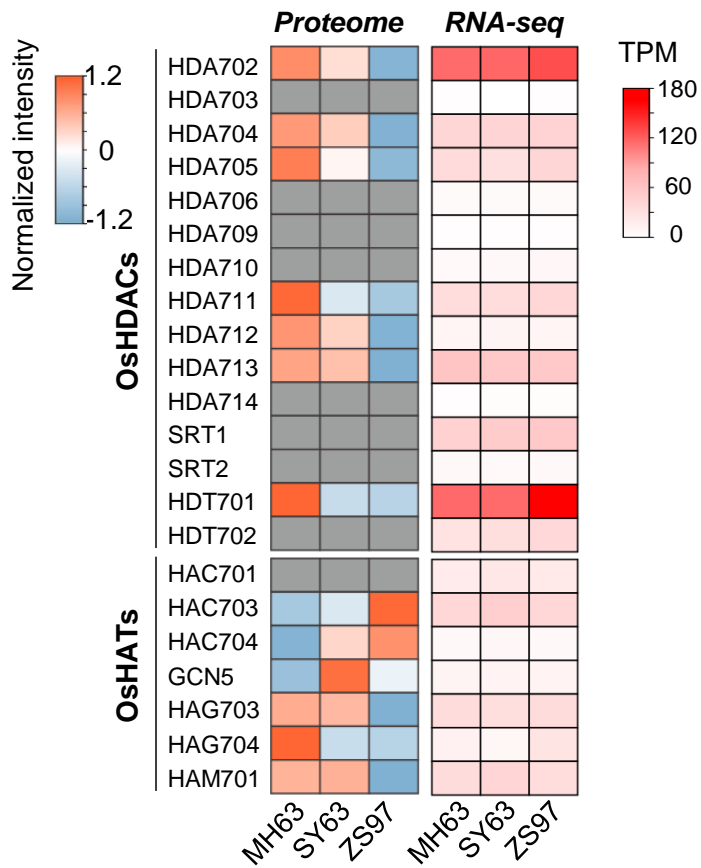

**Supplemental Figure 11.** Heatmap showing the protein abundance (left) and transcript levels (right) of rice histone acetyltransferases (OsHATs) and deacetylase (OsHDACs) in MH63, ZS97 and SY63 young panicles.

## Supplemental References (Related to Supplemental Fig. 7D)

- Tang, B., Liu C., Li, Z., Zhang, X., Zhou, S., Wang, G.L., Chen, X.L., Liu, W. (2021). Multilayer regulatory landscape during pattern-triggered immunity in rice. *Plant Biotechnol J* 19: 2629-2645.
- Xu, Q., Liu, Q., Chen, Z., Yue, Y., Liu, Y., Zhao, Y., Zhou, D.X. (2021). Histone deacetylases control lysine acetylation of ribosomal proteins in rice. *Nucleic Acids Res* 49:4613–4628.
- Zhou, H., Finkemeier, I., Guan, W., Tossounianet, M.A., Wei, B., Young, D., Huang, J., Messens, J., Yang, X., Zhu, J. et al (2018). Oxidative stress-triggered interactions between the succinyl- and acetyl-proteomes of rice leaves. *Plant Cell Environ* 41:1139–1153.
- Wang, Y., Hou, Y., Qiu, J., Li, Z., Zhao, J., Tong, X., Zhang, J. (2017). A Quantitative Acetylomic Analysis of Early Seed Development in Rice (*Oryza sativa* L.). *Int J Mol Sci* 18, 1376.
- Xue, C., Liu, S., Chen, C., Zhu, J., Yang, X., Zhou, Y., Guo, R., Liu, X., Gong, Z. (2018). Global Proteome Analysis Links Lysine Acetylation to Diverse Functions in *Oryza Sativa*. *Proteomics* 18, 1700036.
- Xiong, Y., Peng, X., Cheng, Z., Liu, W., Wang, G.L. (2016). A comprehensive catalog of the lysine-acetylation targets in rice (*Oryza sativa*) based on proteomic analyses. *J Proteomics* 138: 20-29.
- Meng, X., Lv, Y., Mujahid, H., Edelman, M.J., Zhao, H., Peng, X., Peng, Z. (2018). Proteome-wide lysine acetylation identification in developing rice (*Oryza sativa*) seeds and protein co-modification by acetylation, succinylation, ubiquitination, and phosphorylation. *BBA – Proteins Proteom* 1866: 451–463.
- Li, X., Ye, J., Ma, H., Lu, P. (2018). Proteomic analysis of lysine acetylation provides strong evidence for involvement of acetylated proteins in plant meiosis and tapetum function. *Plant J* 93: 142–154.

# Supplemental Tables

**Supplemental Table 1.** Summary of the MS/MS spectrum raw data.

|           | Total spectrum | Matched spectrum | Peptides | Unique/modified peptides | Identified proteins | Quantifiable proteins | Identified Kac sites | Quantifiable Kac sites | Normalized proteins | Normalized Kac sites |
|-----------|----------------|------------------|----------|--------------------------|---------------------|-----------------------|----------------------|------------------------|---------------------|----------------------|
| Proteome  | 1,780,842      | 293,520          | 43,713   | 40,155                   | 6,952               | 5,725                 | NA                   | NA                     | NA                  | NA                   |
| Acetylome | 464,470        | 91,451           | 15,132   | 10,691                   | 3,994               | 3,222                 | 10,852               | 7,948                  | 2,290               | 6,069                |

**Supplemental Table 2.** Summary of H3K9ac ChIP-seq raw data.

| Sample | Replicates | Clean reads (millions) | Uniquely aligned reads (millions) | Total aligned reads (millions) | Total peaks | Modified genes | R-squared TPM (all genes) |
|--------|------------|------------------------|-----------------------------------|--------------------------------|-------------|----------------|---------------------------|
| MH63   | 1          | 63.5                   | 33.7 (53.1%)                      | 43.7 (68.8%)                   | 34,339      | 22,440         | 0.904                     |
| MH63   | 2          | 24.9                   | 12.8 (51.3%)                      | 17.2 (69%)                     | 33,578      | 21,378         |                           |
| SY63   | 1          | 29.4                   | 15.1 (51.4%)                      | 20.2 (68.9%)                   | 34,481      | 21,296         | 0.993                     |
| SY63   | 2          | 27.4                   | 13.7 (49.9%)                      | 17.4 (63.6%)                   | 34,804      | 22,161         |                           |
| ZS97   | 1          | 26                     | 14.9 (57.3%)                      | 19.3 (74.3%)                   | 24,669      | 20,459         | 0.87                      |
| ZS97   | 2          | 17.6                   | 10.3 (58.5%)                      | 13.6 (77.5%)                   | 23,315      | 19,498         |                           |



**Supplemental Table 3.** Lysine acetylation sites and values of TORC1 proteins.

| Gene locus      | Protein | Kac sites | MH63  | SY63   | ZS97  |
|-----------------|---------|-----------|-------|--------|-------|
| OsMH_05G0123700 | TOR     | K1650     | 0.816 | 0.993  | NA    |
|                 |         | K278      | NA    | 0.918  | NA    |
|                 |         | K1608     | NA    | 1.486  | 0.776 |
| OsMH_12G0008800 | RAPTOR  | K181      | 1.07  | NA     | 1.213 |
| OsMH_03G0472800 | LST8    | K50       | 0.963 | 0.956  | NA    |
|                 |         | K278      | 0.892 | 1.265  | 0.659 |
|                 |         | K21       | 0.641 | 0.89   | 1.451 |
| OsMH_02G0526800 | FKBP12  | K37       | NA    | 1.081  | 0.628 |
|                 |         | K31       | 0.764 | 1.0897 | 1.113 |

**Supplemental Table 4. Primers used RT-qPCR.**

| Primer name | Sequence(5'-3')        |
|-------------|------------------------|
| RPS1-F      | TTGAGGTGGAGCTGATAAACTG |
| RPS1-R      | TGCTTGAAGAGTGAAGGATCG  |
| RPS6a-F     | CGATCACTGAAGACTGCTCTC  |
| RPS6a-R     | ACCAGCGTTCTCCATTTTAC   |
| RPL5-F      | GATTGTAGTGAATTGCGGGTTG |
| RPL5-R      | AGTTGAACATTACCCTGCCG   |
| RPL13-F     | CGGTACAGAAAGCTCTACAG   |
| RPL13-R     | ATGTTCTGCTCCCTTGACAC   |
| RPL18b-F    | CAGTCTGCTCTTTCTGTCTTC  |
| RPL18b-R    | ATGCTCTCGTTGACCTTGG    |
| Amy3D-F     | AGCAACTCACTATCGAACACG  |
| Amy3D-R     | CGACTTGGCCTTTCAACATG   |
| MYBS1-F     | CGAAGACGAGCACAGGTTG    |
| MYBS1-R     | GTGATGTCATGGATGCTCTTG  |
| WRKY32-F    | AGGTAGTTGAAGTGGTTGTGG  |
| WRKY32-R    | TTACCATGTGCTTCTCTTCCG  |
| ATG13b-F    | AGCTAGATTTTCGCCACCTC   |
| ATG13b-R    | CGAGATTGAAGATACCCGCTG  |
| HSP70b-F    | AAGCGGTTGATTGGTAGGAG   |
| HSP70b-R    | CTCCCTCATCTTGATCAGCAC  |
| Actin-F     | TGTATGCCAGTGGTCGTACCA  |
| Actin-R     | CCAGCAAGGTCGAGACGAA    |
